# Supplementary material
Source: publisher site journal article supplement (https://www.degruyter.com/publication/isbn/978-3-8394-2589-3/downloadAsset/9783839425893_Leseprobe.pdf)
Supplement: Supplementary file 1 [file 9783839425893_Leseprobe.pdf]

# Inhalt

---

## **Einleitung: Konkurrenz als Epochenparadigma**

THOMAS KIRCHHOFF | 7

## **Vom Recht zur Ökonomie**

›Konkurrenz‹ im römischen Recht, in der Schule von Salamanca und bei den französischen Physiokraten

HANS-MICHAEL EMPPELL | 37

## **Konkurrenz – wie viel darf's denn sein?**

Zum theoretischen Fundament und der Frage nach dem richtigen Maß in Ökonomie und Politik

HANS DIEFENBACHER, DOROTHEE RODENHÄUSER | 63

## **Kapitalismus und Staatenkonkurrenz**

TOBIAS TEN BRINK | 93

## **Die Rote Königin jagt den Hofnarren**

Konkurrenz auf der Bühne der Ökologie und im Spiel der Evolution

GEORG TOEPFER | 117

## **Konkurrenz in der Natur**

Interspezifische Konkurrenz als

Organisations- und Entwicklungsprinzip von Ökosystemen?

THOMAS KIRCHHOFF | 139

## **Konkurrenz als Beharrungsprinzip**

Soziologische Theorie im Anschluss an Lewis Carroll

TILMAN REITZ | 165

### **Konkurrenz und Solidarität**

Alternative oder verwobene Formen sozialer Interaktion?

MARKUS VOGT | 191

### **Konkurrenz –**

### **Ordnungsprinzip zwischen Integration und Desintegration**

PETER IMBUSCH | 215

### **Individualisierung durch Konkurrenz**

Grundlagen und Entwicklungsdynamik antagonistischer Kooperation

MAGNUS SCHLETTE | 241

### **Konkurrenz der Religionen?**

ROLF SCHIEDER | 265

### **Konkurrenz und Kompetenz**

REINHARD SCHULZ | 289

### **Konkurrenz im Gesundheitssystem**

A. KATARINA WEILERT, JULIA PFITZNER | 313

### **Die Inszenierung von Alternativen**

Zur Konkurrenz bio- und alternativmedizinischer  
Heilverfahren im Gesundheitswesen

THORSTEN MOOS | 341

### **Von Deutungsmacht und Bücherschlacht**

Vermerke zu literarischen Konkurrenzen

JÖRG THOMAS RICHTER | 371

**Autorinnen und Autoren | 395**

# Einleitung: Konkurrenz als Epochenparadigma

---

THOMAS KIRCHHOFF

## KONKURRENZ ALS UBIQUITÄRES ORGANISATIONSPRINZIP<sup>1</sup>

Charakterisierungen moderner Gesellschaften fallen durchaus unterschiedlich aus. Weitgehend einig ist man sich jedoch, dass Konkurrenz in modernen Gesellschaften einen grundlegenden, wenn nicht sogar dominanten Modus gesellschaftlicher Interaktion darstellt. Seitdem das Leistungsprinzip gegen das Prinzip autoritativer Zuschreibung forciert worden ist, um eine liberalistisch-bürgerliche Gesellschaft anstelle einer auf Privilegien beruhenden feudalen Gesellschaft zu realisieren, hat Konkurrenz bzw. das Konkurrenzprinzip in modernen<sup>2</sup> Gesellschaften immer weitere, seit einigen Jahrzehnten beinahe ubiquitäre Verbreitung gefunden.<sup>3</sup> Man kann moderne Gesellschaften mittlerweile als *Konkurrenzgesellschaften*<sup>4</sup> bzw.

- 
- 1 Mein besonderer Dank gilt den Autorinnen und Autoren dieses Bandes. Ihre Aufsätze bilden auch eine wesentliche Grundlage für diese Einleitung. Meinen Kolleginnen und Kollegen an der FEST e.V., Institut für interdisziplinäre Forschung, Heidelberg, danke ich für die zahlreichen Diskussionen zur Konkurrenzthematik. Für konkrete Verbesserungsvorschläge zum Manuskript dieser Einleitung danke ich Gisela Kirchhoff und Magnus Schlette. Der FEST e.V. gilt mein Dank für die Finanzierung dieser Publikation.
  - 2 Mit modernen Gesellschaften meine ich hier alle nach-traditionellen, durch die Aufklärung geprägten Gesellschaften, ohne zwischen modernen, spätmodernen, postmodernen usw. Gesellschaften zu differenzieren.
  - 3 Siehe z.B. Polanyi 1944; Sonntag 1999; Veith 2001; Rosa 2006; 2012: Kapitel 8. Siehe Diefenbacher/Rodenhäuser in diesem Band.
  - 4 Schon Horkheimer/Adorno (1947/1993: 164) beklagen »die Härte der Konkurrenzgesellschaft«.

als *Wettbewerbsgesellschaften* bezeichnen, weil in ihnen fast alle zentralen gesellschaftlichen Funktionssphären und Institutionen bzw. Handlungsbereiche – Politik, Wirtschaft, Recht, Wissenschaft, Kunst, Massenmedien, Erziehung, Bildung, Gesundheitswesen, Religion, Sport, Familie, Intimbeziehungen usw. – mehr oder weniger wettbewerbsförmig organisiert sind, während die zuvor dort gültigen Prinzipien sukzessive erodieren, *und* weil Konkurrenz- bzw. Wettbewerbsfähigkeit zu einem zentralen, oft zum dominanten Handlungsziel individueller wie kollektiver Akteure geworden ist.<sup>5</sup> Und moderne Gesellschaften sind nicht nur faktisch Konkurrenzgesellschaften, sondern sie sind es auch in normativem Sinn: Konkurrenz wird weithin als gesellschaftliches Organisationsprinzip und als Basis sozialer Ungleichheit und Hierarchie akzeptiert, ja affirmiert,<sup>6</sup> und im neoliberalen Mainstream sogar als uneingeschränkt notwendig angesehen.

Mit dieser Charakterisierung moderner Gesellschaften soll nicht gesagt sein, es habe in traditionellen, vormodernen Gesellschaften keine Konkurrenz gegeben.<sup>7</sup> Gemeint ist vielmehr, dass Konkurrenz in modernen Gesellschaften – und erst in diesen – zu einem tendenziell ubiquitären Interaktions-, Koordinations- und Allokationsmodus geworden ist, dessen Resultate maßgeblich sind für die (Legitimierung der) Verteilung von Ressourcen, Gütern, Positionen, Macht etc.<sup>8</sup> In Konkurrenzgesellschaften kann man nicht nur im genuin ökonomischen Feld, sondern in praktisch allen gesellschaftlichen Feldern eine »*Verwettbewerblichung*«<sup>9</sup> beobachten, die – mit Blick darauf, dass die Ökonomie das klassische Wettbewerbsfeld moderner Gesellschaften ist – auch als »*Ökonomisierung*«<sup>10</sup>

---

5 Vgl. Simmel 1903/1995: insb. 221 f.; Mannheim 1929: insb. 38, 43; Rosa 2006: 82–85; 2012: 324–326; Duret 2009: insb. 7–10; Jessen 2014a: 7. Ein Blick auf die Geschichte des Kapitalismus (Kocka 2014) zeigt, dass das Konkurrenzprinzip historisch zumeist im Bereich der Wirtschaft als das zentrale Prinzip angesehen wurde, andere Gesellschaftsbereiche aber bis vor relativ kurzer Zeit nach anderen Prinzipien organisiert waren. Siehe insb. Diefenbacher/Rodenhäuser, Empell, Schieder, Schlette und Schulz in diesem Band.

6 Duret 2009: Introduction.

7 Siehe hierzu die Studien in Jessen 2014b, die belegen: »In allen historischen Gesellschaften hat es kompetitives Handeln gegeben, das sich in spezifischen Konstellationen von Werthaltungen und Regeln, Praktiken und Verhaltenserwartungen abspielte.« (Jessen 2014a: 18) Siehe insb. Imbusch und Reitz in diesem Band.

8 Rosa 2012: 328 f. Entsprechendes gilt für das Leistungsprinzip (Hartfiel 1977b: 11–17).

9 So z.B. Wetzel 2013b: 66.

10 Siehe z.B. Harms/Reichard (2003: 13), die »*Ökonomisierung*« definieren als zunehmende Orientierung der Werthaltung von Akteuren an ökonomischer Rationalität.

bezeichnet wird. Die Rede von einer »Marktgemeinschaft« hebt hervor, dass die Umsetzung des Leistungs- und Konkurrenzprinzips durch die Institution des Marktes erfolgt.<sup>11</sup> Die Rede von »Wettbewerbskulturen«<sup>12</sup> zeigt an, dass Wettbewerb zu einem alltäglichen, von den Subjekten verinnerlichteten kollektiven Handlungsmodus geworden ist, der in den unterschiedlichen gesellschaftlichen Funktionssphären bzw. Institutionen – darum der Plural »Kulturen« – auf ganz unterschiedliche Weise organisiert ist<sup>13</sup> und nicht, wie die Rede von einer Ökonomisierung es nahelegt, nur in Kategorien von ökonomischem Wettbewerb gedeutet werden darf.<sup>14</sup>

Im Zuge wirtschaftlicher Globalisierung ist das Konkurrenzprinzip auch in den Beziehungen zwischen Gesellschaften bzw. Staaten immer einflussreicher geworden:<sup>15</sup> Die Förderung der Wettbewerbsfähigkeit gilt vielfach als die vordringliche Aufgabe staatlichen Handelns und drängt klassische national- und sozialstaatliche Ziele in den Hintergrund. Dabei ging es zunächst vor allem um die internationale Wettbewerbsfähigkeit der Firmen des eigenen Landes, seit den 1990er Jahren geht es immer mehr um die Steigerung der Konkurrenzfähigkeit des Staates selbst als Standort für transnational agierende Unternehmen (Staatenkonkurrenz): »As the world economy is characterized by increasing interpenetration and the crystallization of transnational markets and structures, the state itself is having to act more and more like a market player, that shapes its policies to promote, control, and maximize returns from market forces in an international setting.«<sup>16</sup> Konkret bedeutet das zumeist: Der *competition state*<sup>17</sup> treibt, in neoliberalistischer Manier, die Einführung wettbewerblicher Verfahren in möglichst allen Gesellschaftsbereichen voran und beseitigt wohlfahrtsstaatliche Dekom-

---

11 Siehe z.B. Neckel 2001; Rosa 2006: 83. In geschichtlicher Perspektive zum Markt siehe jüngst Herzog/Honneth 2014. Siehe Reitz in diesem Band.

12 Nullmeier 2000: 215, 236; 2002: Titel; Tauschek 2013a; Wetzel 2013a: insb. 29.

13 Nullmeier 2000: insb. 236; 2002: insb. 162; Duret 2009: Kapitel 1.1; Tauschek 2013b: insb. 12–17; Wetzel 2013b: insb. 59. Vgl. Tauschek 2013a; Wetzel 2013a.

14 Mit als erste haben Simmel (1903/1995) und Mannheim (1929) gefordert, »Konkurrenz nicht nur als Phänomen der ökonomischen Sphäre [...], sondern als Phänomen des gesamten gesellschaftlichen Lebens« (ebd.: 38), als »eine allgemeine soziale Beziehung« (ebd.: 43) zu analysieren. Siehe insb. Imbusch, Reitz, Richter, Schieder, Schlette, Schulz und Vogt in diesem Band.

15 Siehe Diefenbacher/Rodenhäuser und insb. ten Brink in diesem Band.

16 Cerny 1990: 230; vgl. Rosa et al. 2007: 264–269. Siehe ten Brink in diesem Band.

17 Cerny 1990: Kapitel 8.

modifizierungen. Das heißt, der Staat zieht sich aus der Regelung ökonomischer und sozialpolitischer Probleme zurück und weist die Verantwortung für individuelle Lebensrisiken dem Einzelnen zu.<sup>18</sup> So sind Märkte auch für klassische öffentliche und meritorische Güter wie Gesundheitswesen, öffentliche Sicherheit, schulische und universitäre Bildung usw. geschaffen worden – oder man hat, wo dies nicht möglich war, künstliche Wettbewerbe in Form von Evaluierungen, Exzellenzinitiativen usw. inszeniert.<sup>19</sup>

Entsprechend der Formierung der modernen Gesellschaften zu Konkurrenzgesellschaften hat sich auf Seiten der einzelnen Menschen, der individuellen Subjekte, ein neues Selbstverständnis herausgebildet. Zu dessen zentralen Bestimmungen gehört ein *Imperativ der Selbstoptimierung* der eigenen, individuellen Konkurrenzfähigkeit, der im Imperativ bzw. im Leitbild vom »unternehmerischen Selbst«<sup>20</sup> gipfelt, das für viele ein Schreckbild ist.<sup>21</sup> Der Imperativ der Selbstoptimierung hat sich herausgebildet einerseits auf der Basis der Idee der Individualität bzw. auf der Basis der Realität der Freisetzung aus kollektiven traditionellen Bindungen (Individualisierungsthese/-narrativ) – ohne, dass allerdings diese Idee in jenem Imperativ aufginge<sup>22</sup> – und andererseits auf der Basis der Idee der Rationalität bzw. der Realität von Disziplinierungen durch Affektkontrolle,<sup>23</sup> Normen usw. (Disziplinierungsthese/-narrativ).<sup>24</sup>

---

18 Siehe Diefenbacher/Rodenhäuser und Schieder in diesem Band.

19 Binswanger 2010. Siehe insb. Diefenbacher/Rodenhäuser, Imbusch, Moos, Reitz, Richter, Schieder, Schulz und Weilert/Pfitzner in diesem Band.

20 Bröckling 2007: 46; vgl. Rosa 2006: 82.

21 Siehe insb. Schieder und Schulz in diesem Band.

22 Siehe Schlette in diesem Band.

23 Die Etablierung des Konkurrenzprinzips korrespondiert auffällig mit der ebenfalls im 18. Jahrhundert erfolgenden Etablierung des Begriffs des Interesses, genauer: Sie korreliert damit, dass nun in interessen geleiteten, rationalen, vorhersehbaren und konstanten Handlungen ein Gegenspieler zu den unvorhersehbaren, irrationalen Leidenschaften gesehen wurde (Hirschman 1977), sodass sich die Affektkontrolle der Individuen zunehmend durch Selbstzwang statt durch Fremdzwang realisierte. Siehe Schieder in diesem Band.

24 Reckwitz 2010: 9–14, dem ich in der Ansicht folge, dass Individualisierung und Disziplinierung bzw. soziale Formung *nicht* als widerstreitende Alternativen zu begreifen sind. Zur Entstehung und Charakterisierung dieser modernen Individualitätskonzeption siehe auch Sonntag 1999; Veith 2001. Siehe Diefenbacher/Rodenhäuser in diesem Band.

Dieses Selbstverständnis führt dazu, dass individuelle Zielsetzungen und Zuschreibungen gegenüber kollektiven in den Vordergrund rücken, womit Konkurrenz eine andere gesellschafts- und sozialpolitische Bedeutung erhält.<sup>25</sup> In einer Klassengesellschaft konkurrieren Gruppen miteinander, deren Mitglieder durch das Bewusstsein kollektiver Interessen sowie Werte verbunden sind und denen es vornehmlich um eine Verbesserung der gemeinschaftlichen Situation geht; in einer Gesellschaft von Individuen<sup>26</sup> hingegen steht der persönliche Erfolg im Vordergrund, durch den die Individuen für sich einen verbesserten sozialen Status erreichen wollen, wobei die Gründe für Erfolg und Misserfolg weniger in Gruppenzugehörigkeiten als in der individuellen Verantwortung liegend angesehen werden. So ist es zu einer Verschiebung von Grundwerten gekommen: Kollektive und solidarische Prinzipien treten in den Hintergrund, egoistische wie Leistung, Konkurrenz und individuelle Selbstverantwortung in Vordergrund.<sup>27</sup>

Auch wenn wir über Natur nachdenken ist Konkurrenz zu einem wesentlichen Erklärungsprinzip geworden.<sup>28</sup> Den Anfang biologischen Konkurrenzdenkens bilden wohl die biogeographischen Überlegungen de Candolles<sup>29</sup> aus dem Jahr 1820, der – beeinflusst durch Thomas Malthus’ Bevölkerungstheorie – die begrenzte geografische Verbreitung von Pflanzenarten als Folge ihres Ausschlusses durch interspezifische Konkurrenz erklärte. Mit der Etablierung von Charles Darwins<sup>30</sup> Theorie natürlicher Selektion hat sich in der Biologie die Überzeugung verbreitet, dass Konkurrenz das zentrale Entwicklungs-, Differenzierungs- und Optimierungsprinzip in der belebten Natur ist – mit auffallenden Analogien zu ökonomischen Theorien der Steigerung der Effizienz bzw. Konkurrenzfähigkeit durch Arbeitsteilung bzw. Spezialisierung. Daraus entwickelten sich seit den 1950er Jahren Theorien über die Organisationsweise ökologischer Gesellschaften, sogenannte nischentheoretische Konkurrenztheorien, die mit der Annahme eines ökologischen End- und Gleichgewichtszustandes, in dem die

---

25 Es folgt eine sinngemäße Übersetzung des Anfangs von Kapitel 1 in Duret 2009. Siehe zu dieser Thematik insb. Schlette in diesem Band.

26 Vgl. Elias 1991.

27 Siehe insb. Imbusch, Schlette und Vogt in diesem Band, die diese einfache Gegenüberstellung zu einem differenzierteren, wechselseitige Bestimmungen berücksichtigenden Bild weiterentwickeln.

28 Siehe Kirchhoff und Toepfer in diesem Band.

29 Candolle 1820.

30 Darwin 1859.

verfügbaren Ressourcen eines Standortes vollständig und optimal genutzt werden, überdeutliche strukturelle Parallelen zu den ökonomischen Gleichgewichtstheorien der Neoklassik mit ihrer Annahme eines marktwirtschaftlichen Pareto-Optimums aufweisen. Seit den 1980er Jahren sind diese nischentheoretischen Konkurrenztheorien zwar – wie zuvor die ökonomische Neoklassik – in die Kritik geraten, insbesondere ihre Gleichgewichts- und Optimalitätsannahme; Konkurrenz ist in der Ökologie aber ein zentrales Erklärungsprinzip geblieben – mit neuartigen Parallelen zu neuartigen ökonomischen Theorien.<sup>31</sup> Und wo die Relevanz anderer Interaktionsformen betont wird, zum Beispiel die mutualistischer Beziehungen,<sup>32</sup> bilden Konkurrenztheorien zumeist den Hintergrund der Überlegungen.

Mit diesen Ausführungen soll nicht gesagt sein, die Theoriebildung in der Biologie und speziell der Ökologie sei nichts anderes als eine Reformulierung ökonomischer Theorien für den Gegenstandsbereich der belebten Natur.<sup>33</sup> Deutlich werden sollte vielmehr: (a) Es lassen sich Parallelen zwischen Konkurrenztheorien über Gesellschaft und über Natur aufzeigen – und Entsprechendes gilt für Konkurrenztheorien, die in den verschiedenen mit Gesellschaft befassten Disziplinen formuliert worden sind –, sodass die Rede die von *travelling theories* bzw. *travelling concepts*<sup>34</sup> angemessen erscheint. Der Sozialdarwinismus exemplifiziert, dass dabei nicht nur Konkurrenztheorien über Gesellschaft auf Natur übertragen wurden, sondern auch umgekehrt Konkurrenztheorien über Natur auf Gesellschaft. (b) Konkurrenz gilt mittlerweile als wesentliches Organisations- und Entwicklungsprinzip in Gesellschaft *und* Natur, insbesondere in evolutionären Erklärungsmodellen von Ordnungsbildung, Differenzierung und Optimierung.<sup>35</sup> Insofern kann man *Konkurrenz als Epochenparadigma* bezeichnen: Konkurrenztheorien liefern Natur und Gesellschaft übergreifende Erklärungsmuster.

---

31 Siehe Kirchhoff und Toepfer in diesem Band.

32 Siehe z.B. Boucher et al. 1982.

33 Inwiefern Theorien über menschliche Vergesellschaftung bzw. Individualität bzw. Ökonomie allerdings tatsächlich erheblichen Einfluss auf Naturauffassungen, insbesondere auf die Theoriebildung in der Ökologie, hatten und haben siehe Schweber 1977; Großklaus 1983; Williams 1980; Trepl 1987; 1994; Eisel 2004; Köchy 2006; Kirchhoff 2007; 2011; 2014; 2015.

34 Siehe z.B. Said 1983 bzw. Bal 2002. Aufmerksam geworden auf diese Forschungen bin ich durch Hartmut Behr (Newcastle University) und Vera Vicenzotti (SLU/Swedish University of Agricultural Sciences).

35 Siehe Kirchhoff, Toepfer und Vogt in diesem Band.



## KONKURRENZ IN BEGRIFFLICH-STRUKTURELLER PERSPEKTIVE

Versucht man zu klären, was begrifflich genau mit »Konkurrenz« gemeint ist, so wird man mit der Tatsache konfrontiert, dass der Begriff auch in wissenschaftlichen Texten zu Konkurrenz nur selten definiert wird. Zudem fällt auf, dass »Konkurrenz« und »Wettbewerb« in der ökonomischen, soziologischen, politikwissenschaftlichen usw. Literatur zumeist so verwendet werden, als seien es synonyme Begriffe.<sup>36</sup> Außerdem zeigt sich, dass die vorliegenden Definitionen von »Konkurrenz« bzw. von »Wettbewerb« keineswegs übereinstimmen, sondern sich zum Teil wesentlich voneinander unterscheiden. Das gilt nicht nur für Definitionen, die aus unterschiedlichen wissenschaftlichen Disziplinen stammen, sondern auch für solche aus ein und derselben Disziplin.

Trotz und vor allem wegen dieses ernüchternden Befundes soll hier eine allgemeine Definition von »Konkurrenz« und »Wettbewerb« vorgeschlagen werden, weil eine unklare Terminologie bzw. diffuse Begriffsverwendung zu erheblichen Missverständnissen und Fehleinschätzungen führen kann:<sup>37</sup>

(1) *Interaktion*: Das erste Definiens von »Konkurrenz« ist, dass es sich um eine Interaktion von mindestens zwei Akteuren<sup>38</sup> handelt, das heißt um eine Beziehung, in der alle Beteiligten aktiv sind und sich dabei aufeinander beziehen.<sup>39</sup>

(2) *Triadische Struktur*: Das zweite Definiens von »Konkurrenz« lässt sich ausgehend von der lateinischen Wurzel des Wortes, *concurrere*, bestimmen, das

36 Dabei ist der Konkurrenzbegriff wesentlich älter als der Wettbewerbsbegriff, der erst im 19. Jahrhundert geprägt wurde, aber seitdem in der Ökonomie gebräuchlicher ist als der Konkurrenzbegriff (Prochno 2006: 5).

37 Vgl. zum Folgenden die klassischen Überlegungen in Simmel 1903/1995 sowie die aktuellen Charakterisierungen in Rosa 2006: 87–89; Benz 2007: 54–56; Werron 2010. Siehe Kirchhoff und Toepfer in diesem Band. Unberücksichtigt bleibt im Folgenden, dass der Konkurrenzbegriff auch verwendet wird, um eine *Gesamtheit von Konkurrenten* zu bezeichnen: »Die Konkurrenz schläft nicht« etc.

38 Der Begriff *Akteur* wird hier so verwendet, dass er auch nicht-menschliche Lebewesen umfasst, um eine auch die Biologie umfassende allgemeine Definition entwickeln zu können. Das heißt nicht, dass ich die Akteur-Netzwerk-Theorie von Latour affirmiere und wie dieser auch nicht lebende Dinge als Akteure bestimmen möchte.

39 Darin liegt eine Differenz zu *Konflikten*: Diese *können* auch darin bestehen, dass ein und dieselbe Person unterschiedliche Ziele verfolgt, die sich nicht uneingeschränkt zugleich verwirklichen lassen.

soviel bedeutet wie »zusammenlaufen« und »von zwei oder mehreren Seiten zusammentreffen«, aber auch »aufeinanderrennen« und »zusammenstoßen«. <sup>40</sup> Entsprechendes gilt für das englische *competition*: Dessen lateinische Wurzel, *competere*, hatte Bedeutungen wie »zu etwas fähig sein«, »zugleich anstreben«, »gemeinsam anstreben« und »wetteifern«. Das heißt, die Interaktion wird dadurch *konstituiert*, dass die Akteure dasselbe Ziel verfolgen. Konkurrenz besteht, so Simmel, »in den parallelen Bemühungen beider Parteien um einen und denselben Kampfpreis« <sup>41</sup>. Das bedeutet, wie Simmel klar herausgearbeitet hat, dass Konkurrenz formal eine triadische Struktur hat: Um unter den Begriff der Konkurrenz zu fallen, muss die Interaktion durch ein Drittes konstituiert sein, das von den Akteuren geschieden ist, das, so Simmel, »sich nicht in der Hand eines der Gegner befindet.« <sup>42</sup> Darin liegt eine Differenz zum Kampf und zu anderen Konflikten, die auch ohne Bezug auf ein solches Drittes stattfinden *können* als dyadische Interaktion.

(3) *Indirekte Beziehung*: Das dritte Definiens von »Konkurrenz« – wodurch sie sich außerdem wesentlich von Kämpfen und anderen Konflikten unterscheidet – ist, dass die Konkurrenzbeziehung nicht nur durch ein Drittes konstituiert wird, sondern zur Gänze durch das Dritte vermittelt wird, also eine indirekte Beziehung ist. »Für das soziologische Wesen der Konkurrenz ist es zunächst bestimmend, daß der Kampf ein indirekter ist. Wer den Gegner unmittelbar beschädigt oder aus dem Wege räumt, konkurriert insofern nicht mehr mit ihm« <sup>43</sup>, sondern er kämpft gegen ihn. Konkurrenten gehen nicht direkt gegeneinander vor; die direkte Schädigung des Konkurrenten ist weder das Ziel noch das Mittel von Konkurrenz. In der Konkurrenz führt nicht die Schädigung des Gegners zum Erfolg, sondern der Erfolg führt zu dessen Schädigung.

---

40 Georges 1972; Kluge 2002. Ein ursprünglicher Kontext dieser Bedeutungen waren wohl die antiken sportlichen und musische *Agone* (Prochno 2006: 5). Siehe Empell und Richter in diesem Band.

41 Simmel 1903/1995: 222. Anzumerken ist, dass Simmel, wie später noch Weber (1922: 1. Teil, Kapitel I., § 8), Konkurrenz als Unterform von Kampf begreift, aber gleichzeitig so bestimmt, dass ihr fehlt, was üblicherweise (siehe Bihack 1998: 16, 24 f.) als dessen Charakteristikum angesehen wird: Kampfgegner agieren aktiv direkt gegeneinander, versuchen, ihr Ziel gegen den Widerstand der gegnerischen Kraft durchzusetzen.

42 Simmel 1903/1995: 222.

43 Ebd. Ähnlich definiert Weber (1922: 1. Teil, Kapitel I., § 8): »Der ›friedliche‹ Kampf soll ›Konkurrenz‹ heißen, wenn er als formal friedliche Bewerbung um eigne Verfügungsgewalt über Chancen geführt wird, die auch andre begehren.«

(4) *Wechselseitige Beeinträchtigung*: Das letzte Definiens ist, dass die Interaktion für *beide* Interaktionspartner mit einer Beeinträchtigung verbunden ist. Der unterlegene Konkurrent wird beeinträchtigt, weil die Zielerreichung des überlegenen Konkurrenten dazu führt, dass er selbst sein Ziel ganz oder teilweise nicht erreichen kann. Der überlegene Konkurrent ist beeinträchtigt, weil er sein Ziel nur mit einem vergrößerten Aufwand und/oder nur mit Einschränkungen erreichen kann.<sup>44</sup> Wird der Akteur, der sein Ziel erreicht, nicht dadurch beeinträchtigt, dass auch ein anderer Akteur dasselbe Ziel zu erreichen sucht, so steht zwar dieser Akteur mit jenem Akteur, nicht aber jener mit diesem in einer Interaktionsbeziehung – und es liegt keine Konkurrenz vor, sondern, so zumindest nennt man diese Beziehung in der Biologie im Unterschied zu Konkurrenz, ein Amensalismus.<sup>45</sup>

Entsprechend diesen Überlegungen schlage ich folgende *allgemeine Definition von Konkurrenz* vor: Konkurrenz ist eine indirekte, triadische Interaktion zwischen mindestens zwei Akteuren, die durch ein gemeinsames Ziel konstituiert wird, bei bzw. durch dessen Realisierung sich die Akteure wechselseitig beeinträchtigen.

Neben diesen definierenden Merkmalen zeichnet sich Konkurrenz durch Charakteristika aus, die häufig mit ihr verbunden und für das Verständnis ihrer Dynamik und sozialen Wirkungen von erheblicher Bedeutung sind:

(5) *Dyadische Dynamik*: In vielen Fällen *wissen* die Konkurrenten voneinander und reagieren wechselseitig aufeinander mit Verhaltensänderungen,<sup>46</sup> die vielfach zu erhöhten Anstrengungen führen. Dabei hat jeder Konkurrent seine Gegner im Blick, sucht aber sein Ziel zu verwirklichen, »ohne eine Kraft auf den Gegner zu verwenden«<sup>47</sup>, das heißt, ohne zu versuchen, diesen zu behindern etc.<sup>48</sup>

---

44 Beispiele sind Athleten, die ohne Konkurrenten für die Anerkennung ihrer Leistung weniger hätten trainieren müssen, und Produzenten, die ohne Konkurrenten Produkte verkaufen könnten, die weniger Investitionen in Qualitätsverbesserungen erfordert hätten.

45 Abrams 1987: 272–274; Begon et al. 1996: 200 f. Siehe Kirchhoff in diesem Band.

46 Siehe Schlette in diesem Band.

47 Simmel 1903/1995: 223.

48 Simmel (ebd.: 223 f.) erläutert diese dyadische Dynamik so: »Der Wettläufer, der nur durch seine Schnelligkeit, der Kaufmann, der nur durch den Preis seiner Ware [...] wirken will, exemplifizieren diese merkwürdige Art des Kampfes, die an Heftigkeit und leidenschaftlichem Aufgebot aller Kräfte jeder anderen gleichkommt, zu dieser äußersten Leistung auch nur durch das wechselwirkende Bewußtsein von der Leistung des Gegners gesteigert wird, und doch, äußerlich angesehen, so verfährt, als ob kein Gegner, sondern nur das Ziel auf der Welt wäre.«

Zwischen Pflanzen und zumeist auch zwischen Tieren fehlt dieses wechselseitige Bewusstsein. Natürliche Selektion kann hier aber in koevolutionären Prozessen zu ähnlichen Effekten führen.<sup>49</sup>

(6) *Triadische Dynamik*: Die dyadische Konkurrenzdynamik erweitert sich zu einer komplexen triadischen, wenn die Konkurrenten nicht nur aufeinander reagieren, sondern auch in Interaktionen mit dem umworbenen Dritten eintreten. Die Konkurrenz »zwingt den Bewerber, [...] dem Umworbenen entgegen- und nahezukommen, sich ihm zu verbinden, seine Schwächen und Stärken zu erkunden und sich ihnen anzupassen, alle Brücken aufzusuchen oder zu schlagen, die sein Sein und seine Leistungen mit jenem verbinden könnten. [...] Die moderne Konkurrenz, die man als den Kampf aller gegen alle kennzeichnet, ist doch zugleich der Kampf aller um alle.«<sup>50</sup> Darin besteht, so Simmel, ihre »ungeheure vergesellschaftende Wirkung«<sup>51</sup>. Und dieses umworbene Dritte, das Simmel auch das »Publikum«<sup>52</sup> nennt, reagiert seinerseits auf das Verhalten und die Angebote der Konkurrenten.<sup>53</sup> Das ermöglicht den Konkurrenten, indirekt, vermittelt über das »Publikum«, gegeneinander vorzugehen, beispielsweise indem sie versuchen, sich selbst beim »Publikum« in ein besseres und die Gegner in ein schlechteres Licht zu setzen – man denke an einen »Kaufmann, der seinen Konkurrenten erfolgreich beim Publikum der Unsolidität verdächtig hat«<sup>54</sup>. So kann sich eine triadische Dynamik ergeben, in der die Ziele und die Erfolgskriterien der Konkurrenzsituation nicht vorgegeben sind, sondern sich erst in ihr und durch sie ausbilden.<sup>55</sup>

(7) »*Konkurrenz*« und »*Wettbewerb*«: Diese beiden Begriffe werden häufig synonym verwendet. Demgegenüber möchte ich eine systematische Unterscheidung vorschlagen, die Wettbewerb als eine bestimmte Form von Konkurrenz definiert: »*Wettbewerb*« ist Konkurrenz, die ausgerichtet ist auf ein den Konkurrenten vorgegebenes Ziel und dabei geleitet wird durch den Konkurrenten vorgegebene Regeln.<sup>56</sup> Wettbewerb ist Konkurrenz, die darauf ausgerichtet ist, im

---

49 Siehe Kirchhoff und Toepfer in diesem Band.

50 Simmel 1903/1995: 226 f.; vgl. Benz 2007: 55; Hölkeskamp 2014: 35.

51 Simmel 1903/1995: 226. Siehe Imbusch und Vogt in diesem Band.

52 Ebd.: 223.

53 Vgl. Werron (2009: insb. 17, 20 f.; 2010: insb. 307–310; 2011), der von »Konkurrenz im Horizont des Publikums« spricht. Siehe insb. Reitz und Schlette in diesem Band.

54 Simmel 1903/1995: 223.

55 Siehe Moos sowie insb. Richter und Schlette in diesem Band.

56 Wettbewerb ist demnach das, was Weber (1922: 1. Teil, Kapitel I., § 8) als geregelte

Rahmen ritualisierter oder institutionalisierter Regeln eine optimale oder zumindest bessere Lösung für eine Aufgabe zu realisieren; Wettbewerb wird ermöglicht, gefördert etc., um ein bestimmtes Ziel zu erreichen, zum Beispiel eine möglichst gute Allokation von Ressourcen in einer Gesellschaft.

»Wettbewerb« ist demnach ein normativer Begriff, weil er auf eine soziale Zielsetzung verweist. »Konkurrenz« hingegen ist ein deskriptiver Begriff: Konkurrenz findet einfach statt und bewirkt Veränderungen, die, selbst dann, wenn sie gerichtet sind, niemals ein Ziel realisieren.<sup>57</sup> Zudem unterscheidet Wettbewerb sich dadurch von Konkurrenz, dass die Konkurrenten eines Wettbewerbs voneinander wissen (vgl. Charakteristikum 5). Gemäß dieser Definition gibt es »Wettbewerb« nur in Gesellschaften, nur zwischen Menschen und deren Institutionen, nicht aber in der Natur, nicht zwischen Lebewesen.<sup>58</sup>

## KONKURRENZ IN HISTORISCH-NORMATIVER PERSPEKTIVE

### *Konkurrenz als Prinzip der Emanzipation*

Der fundamentale Umbruch von den traditionellen, vormodernen zu den modernen Gesellschaften ist unter verschiedenen Gesichtspunkten rekonstruiert worden. Säkularisierung, Individualisierung, Selbstverwirklichung, Differenzierung, Rationalisierung und Verrechtlichung sind einschlägige modernisierungstheoretische Stichworte.<sup>59</sup> Mit Blick auf die Genealogie des Konkurrenzprinzips und der Konkurrenzgesellschaft ist entscheidend, dass sukzessive ein fundamentaler

---

Konkurrenz bezeichnet: »Geregelte Konkurrenz« soll eine Konkurrenz insoweit heißen, als sie in Zielen und Mitteln sich an einer Ordnung orientiert.« Vgl. Winter/Würmann 2012: 7. Zum Versuch einer Typologie von Wettbewerbsformen siehe Nullmeier 2000: insb. 228–237; Wetzel 2013a: insb. 30; 2013b: insb. 59.

57 Wetzel (2013a: 57) konstatiert als Differenz zwischen »Wettbewerb« und »Konkurrenz«, »Wettbewerb« werde häufig verwendet, um ein Organisationsprinzip, »Konkurrenz« dagegen meist, um eine akteurszentrierte Handlungsorientierung zu bezeichnen. Zwar mag damit die Differenz in der Verwendung der beiden Begriffe richtig wiedergegeben sein; die systematische Bedeutungsdifferenz der beiden Begriffe scheint mir damit jedoch nicht erfasst.

58 Mit dieser Definition im Einklang ist die Tatsache, dass der Begriff des Wettbewerbs in der Biologie praktisch nicht verwendet wird.

59 Vgl. Degele/Dries 2005; Reckwitz 2010: 9–14; Rosa 2012: 324; Schlette 2013. Siehe insb. Reitz, Schieder und Schlette in diesem Band.

Wandel im sozialen Allokationsmuster erfolgte: An die Stelle des Prinzips der autoritativen Zuschreibung (*ascription pattern*) trat das Prinzip der leistungsabhängigen Zuschreibung (*achievement pattern*).<sup>60</sup> Nicht mehr ererbte Privilegien, nicht mehr gesellschaftlicher Stand, Zunftordnungen, Traditionen und Autorität, sollten über die verfügbaren Güter, die sozialen Beziehungen, die gesellschaftliche Stellung usw. entscheiden (Feudalordnung), sondern die individuelle Arbeitsleistung (Leistungsprinzip).<sup>61</sup> Bürgerliche emanzipatorische Forderungen nach Freiheit und Chancengleichheit, aber auch die wirtschaftlichen Interessen des aufstrebenden Industrie- und Handelsbürgertums standen hinter der Etablierung von Leistung als Prinzip gesellschaftlicher Ordnung.<sup>62</sup> Dabei ging es dem Bürgertum nicht darum, Ungleichheit als solche zu beseitigen, sondern es wollte die feudale ›Privilegienstruktur‹ abschaffen, durch die von vornherein, qua Geburt, eine Positionierung auf einer Skala vertikaler Ungleichheit fixiert wurde.<sup>63</sup>

Mit der Etablierung des Leistungsprinzips ging die Etablierung des Konkurrenzprinzips einher.<sup>64</sup> Konkurrenz wurde zum zentralen Prinzip gesellschaftlicher Organisation, weil mit der Aufhebung von Restriktionen wie dem Zunftzwang freie Konkurrenz möglich wurde, weil die leistungsabhängige Anerkennung und Zuteilung von Positionen, Ressourcen usw. relativ zur Leistung anderer erfolgte, weil Vorzüge versprechende Leistungen von umso mehr Menschen erbracht wurden usw.

### **Konkurrenz als Prinzip der Optimierung**

Konkurrenz ist damit in gewissem Sinne, wie Marx bemerkt hat, »negativ verstanden worden [...] als Negation von Monopolen, Korporation, gesetzlichen Regulationen etc. Als Negation der feudalen Produktion.«<sup>65</sup> Konkurrenz wurde aber bald auch positiv begriffen als ein gesamtgesellschaftliches Optimierungsprinzip.<sup>66</sup> Insbesondere ökonomischem Wettbewerb, also einer geregelten Konkurrenz,

---

60 Rosa 2006: 84; 2012: 326, jeweils mit Verweis auf Parsons 1951. Die Seitenangaben und englischen Zitate (Parsons 1951: 182, 191) wurden von mir ergänzt.

61 Differenziert zur Genese des Leistungsprinzips siehe Hartfiel 1977a; Verheyen 2012.

62 Rammstedt 1976: 973; Hartfiel 1977b: 16. Siehe Schulz in diesem Band.

63 Giegel 2008: 118.

64 Hartfiel 1977b: 16 f., 22; Rosa 2006: 85–88, 93. Siehe Empell in diesem Band.

65 Marx 1857–1858/1953: 317; vgl. ebd.: 542 f.

66 Darauf wird in praktischen allen Beiträgen dieses Bandes eingegangen.

werden seitdem weithin drei zentrale Funktionen zugeschrieben.<sup>67</sup> Die *Allokationsfunktion* gründet darin, dass – so bekanntermaßen Adam Smith<sup>68</sup> – der individuelle Egoismus, das individuelle Leistungsstreben zum gesellschaftlichen Wohlstand aller führt, wenn es einen freien Markt gibt, der die konkurrierenden Einzelinteressen koordiniert. Dabei bewirkt Wettbewerb eine optimale Allokation knapper Ressourcen, eine Steuerung der quantitativen und qualitativen Zusammensetzung des Warenangebots gemäß den Käuferpräferenzen sowie eine Produktdiversifizierung. Ein grundsätzliches Monopolproblem wird nicht gesehen, sofern die Marktzutritts- und Marktaustrittsschranken niedrig sind, weil Monopolgewinne dann Signalwirkung auf potenzielle Anbieter haben. Die *Fortschritts-Innovationsfunktion* gründet darin, dass Wettbewerb eine endogene Dynamik besitzt: Er generiert Anreize für Innovationen, für die ständige Erneuerung und Verbesserung von Produktionsverfahren und Erzeugnisse, sei es als »Creative Destruction«<sup>69</sup>, sei es als »step-by-step« innovation«<sup>70</sup>; denn Innovationen generieren vorübergehende Monopolrenten, bis Imitationen durch Konkurrenten diese zunichte machen – worauf erneute Innovationen folgen, usw. Vielfach sieht man dabei im Wettbewerb, auf geistigem wie materiellem Gebiet, den »leistungsfähigste[n] Prozeß, um bessere Wege zur Erreichung menschlicher Ziele zu entdecken.«<sup>71</sup> Die *Verteilungsfunktion* schließlich soll darin bestehen, dass Wettbewerb zu einer ökonomisch leistungsgerechten Verteilung von Einkommen usw. führt und einer Konzentration von wirtschaftlicher, politischer usw. Macht entgegenwirkt.

### Konkurrenz als prekäres Prinzip

Das Konkurrenzprinzip wird aber nicht nur als Emanzipations- und Optimierungsprinzip begrüßt, sondern auch als problematisch angesehen – und dies nicht erst seit seiner durch den Neoliberalismus forcierten Ausbreitung in alle gesellschaftlichen Felder auch jenseits des ökonomischen Feldes.<sup>72</sup> Die Kritik an Konkurrenz als gesellschaftlichem Ordnungsprinzip lässt sich bis ins 18. Jahrhundert zurückverfolgen.<sup>73</sup> »Auch zur Blütezeit des Liberalismus waren nur die führenden

---

67 Olten 1995: 16 ff.; Herdzina 1999: 32; Nullmeier 2005: 108; Rosa 2006: 90–93; 2012: 334–336. Siehe insb. Diefenbacher/Rodenhäuser, Kirchhoff und Vogt in diesem Band.

68 Smith 1776.

69 Schumpeter 1942: 83.

70 Philippe et al. 2001: 468.

71 Hayek 1973/2002: 115 f.

72 Dies ist ein Hauptthema vieler Beiträge dieses Bandes.

73 Rammstedt 1976: 971.

Schichten, die im Besitze überlegener Konkurrenzmittel standen, sowie die aufsteigenden Völker die eigentlichen Träger der Konkurrenzidee. Die Arbeiterschaft war von jeher ausgesprochen konkurrenzfeindlich, weil sie der Konkurrenz den Lohndruck und die Arbeitslosigkeit zuschrieb«<sup>74</sup>.

Die Kritik am Konkurrenzprinzip ist äußerst vielfältig und liegt auf ganz verschiedenen Ebenen. Hier sollen drei Kritikebenen herausgestellt werden. Es geht erstens um die problematischen Folgen ›gelingenden‹ Wettbewerbs, zweitens um die Unangemessenheit des Konkurrenzprinzips für bestimmte Gesellschaftsbereiche und drittens um den Hinweis, dass Wettbewerb nicht seine eigenen Voraussetzungen schaffen und erhalten kann:

Wettbewerb kann statt zu optimaler Allokation auch zu gesamtgesellschaftlich unsinnigen oder unwirtschaftlichen Resultaten, zu Marktversagen, führen;<sup>75</sup> statt zu Differenzierungen auch zu Angleichungen (*competitive isomorphism*);<sup>76</sup> statt zu wünschenswerter Innovation, auch zum Zwang der permanenten Verbesserung der Konkurrenzfähigkeit, wodurch das Leistungs- und Konkurrenzprinzip nicht Emanzipation, sondern Disziplinierung und Entfremdung bewirkt.<sup>77</sup> Und Wettbewerb führt nicht nur zur Vergesellschaftung von Einzelinteressen, sondern fördert auch einen Individualismus, der viele Menschen ausschließt und die gesellschaftliche Integration gefährdet.<sup>78</sup>

Eine ganze Reihe von Gütern ist im Interaktionsmodus des Wettbewerbs nur schwer oder gar nicht realisierbar; das gilt insbesondere für kollektive Güter.<sup>79</sup>

---

74 Böhler 1950: 388.

75 Bator 1958; Fritsch 2014.

76 Kerr 1983; Unger/van Waarden 1995. Siehe in diesem Band Kirchhoff für evolutionäre Entwicklung in der Natur und Schulz für das Ideal der Kompetenzen.

77 Vgl. die frühe Kritik von Horkheimer und Adorno (1947/1993: 164). Für die aktuelle Kritik siehe z.B. Rosa (2006: 94–101; 2012: Kapitel 8) und Honneth (2009: 44), der konstatiert: »Die Idee der individuellen Verantwortung, die einen durchaus sinnvollen, emanzipierenden Kern enthält, schlägt [...] unter dem Druck eines neoliberal operierenden Kapitalismus in ein neues Mittel der Disziplinierung von Subjekten um. Das Ideal der individuellen Selbstverwirklichung [...] gerät in der jüngsten Zeit zu einer Legitimationsinstanz für weitgehende Flexibilisierungen des Arbeitsmarktes. Was zunächst als ein normativer Fortschrittsprozess begann, schlägt unter den Zwängen einer Expansion kapitalistischer Marktrationalität in eine neue Stufe von Abhängigkeit um«. Siehe insb. Imbusch, Schieder und Schulz in diesem Band.

78 Rammstedt 1976: 971 f.; Imbusch/Heitmeyer 2008. Siehe insb. Imbusch in diesem Band.

79 Rosa 2006: 94; 2012: 338 f. Siehe Diefenbacher/Rodenhäuser und Vogt in diesem Band.



Eine Verteilung nach dem Leistungsprinzip ist in vielen Bereichen ungerecht, insbesondere dort, wo, wie im Gesundheitsbereich, nach Bedürftigkeit oder, wie im Bereich der Bildungschancen und politischen Rechte, nach dem Gleichheitsprinzip verteilt werden sollte.<sup>80</sup> Zudem gibt es zahlreiche Lebensinhalte, die sich nicht angemessen utilitaristisch als Güter, um die konkurriert wird, thematisieren lassen – man denke nur an die Vielfalt kultureller sinnstiftender Gegenstände und Praktiken.<sup>81</sup>

Wettbewerbsysteme können sich nicht selbst regulieren, sie können die für sie notwendigen Bestands- und Geltungsbedingungen weder schaffen noch erhalten; vielmehr sind sie angewiesen auf einen vorgegebenen politisch-sozialen Rahmen, der sich auf der Grundlage von anderen Prinzipien als dem Konkurrenzprinzip konstituiert und reproduziert, zum Beispiel auf der Grundlage von tradierten Werten und Normen.<sup>82</sup> Ohne solche Rahmenbedingungen drohen ruinöse Wettbewerbe zwischen Unternehmen und ein »race to the bottom« staatlicher bzw. gebietskörperschaftlicher Sozial-, Arbeits-, Umwelt- und Steuer-Standards;<sup>83</sup> ferner drohen Monopole, die sich wegen Marktzutrittsschranken nicht durch Konkurrenz wieder auflösen.<sup>84</sup> Zudem kann Wettbewerb die für ihn erforderliche Chancengleichheit nicht gewährleisten; vielmehr verstärkt er häufig, weil sich Wettbewerbsvorteile akkumulieren, schon bestehende Chancenungleichheiten – sei es die zwischen Menschen einer Gesellschaft durch Bildungs-, Konditions- oder Vermögensunterschiede,<sup>85</sup> sei es die zwischen Staaten aufgrund des unterschiedlichen Entwicklungsstandes ihrer Industrien (*infant industries* versus *developed industries*).<sup>86</sup> Schließlich kann ökonomischer Wettbewerb nicht selbst die Voraussetzungen für Kooperation schaffen und erhalten; diese ist aber seine notwendige Voraussetzung, weil ökonomischer Wettbewerb nicht möglich ist ohne den Tausch und die arbeitsteilige Produktion von Waren – beides Formen von gesellschaftlicher Interdependenz und Kooperation.<sup>87</sup>

---

80 Rosa 2012: 337. Siehe Weilert/Pfitzner bzw. Schulz in diesem Band.

81 Siehe insb. Imbusch, Reitz, Schieder und Vogt in diesem Band.

82 Vgl. Rosa 2012: 337; Hölkeskamp 2014: 36, 45. Siehe insb. Diefenbacher/Rodenhäuser in diesem Band.

83 Brecher/Costello 1999: xvii–xix, 13–34. Siehe Diefenbacher/Rodenhäuser in diesem Band.

84 Heimann 1929: 38. Siehe Diefenbacher/Rodenhäuser in diesem Band.

85 Siehe z.B. Boudon 1974; Bourdieu 1982: insb. 272 f; Rosa 2006: 93; 2012: insb. 338. Siehe Diefenbacher/Rodenhäuser und insb. Reitz in diesem Band.

86 Grubel 1966. Siehe Diefenbacher/Rodenhäuser in diesem Band.

87 Vgl. Elias 1939/1992; Rosa et al. 2007: 209. Siehe insb. Imbusch und Vogt in diesem Band.

## KONKURRENZ INTERDISZIPLINÄR BETRACHTET: ZUM INHALT DER AUFSÄTZE DIESES BANDES

Festhalten kann man: So eindeutig es ist, dass Konkurrenz bzw. das Konkurrenzprinzip in modernen Gesellschaften und in deren Beziehungen zueinander nahezu ubiquitäre Verbreitung erlangt hat, sodass man inhaltlich von Konkurrenzgesellschaften, von Konkurrenzstaaten usw. und strukturell von einem Konkurrenzparadigma sprechen kann, so uneindeutig fällt die Beurteilung dieser Tatsache aus. Das Spektrum reicht von der Preisung des Konkurrenzprinzips bis hin zur Fundamentalkritik am Konkurrenzprinzip: Gepriesen wird es, weil es die notwendige Voraussetzung für die Realisierung von individueller Freiheit, Chancengleichheit, gerechter gesellschaftlicher Ordnung, optimaler Ressourcenallokation, einer Pluralität von Möglichkeiten usw. sei. Bemängelt werden fehlende Chancengleichheit im Konkurrenzgeschehen und das Fehlen der Voraussetzungen dafür, dass Konkurrenz ihre potenziellen positiven Wirkungen entfalten kann. Fundamental kritisiert wird das Konkurrenzprinzip mit der Einschätzung, es sei eine Ideologie, die der Legitimation von Ausbeutung, Ungleichheit und Ungerechtigkeit diene. Einerseits ist der Glaube an Konkurrenz als ein Leistung, Effizienz, Differenzierung und Integration steigerndes Prinzip gesellschaftlicher Selbstorganisation kulturell tief verwurzelt. Andererseits haben sich die Wohlstandsversprechungen eines dem freien Wettbewerb überlassenen globalen Geld- und Gütermarktes in vielen Fällen nicht erfüllt; die problematischen Folgen und Nebenfolgen von Konkurrenz sorgen zunehmend für Unbehagen und Protest.

In dieser Situation bedarf es mehr denn je einer kritischen Reflexion über Konkurrenz und über des Konkurrenzprinzip. Es bedarf einer umfassenden Diskussion über die Struktur und Dynamik von Konkurrenzbeziehungen und einer konkreten inhaltlichen Diskussion darüber, in welchen Gesellschaftsbereichen Konkurrenz dem Allgemeinwohl dienen kann und welche Rahmenbedingungen dafür erforderlich sind – und auch darüber, unter welchen Umständen Konkurrenz dem Allgemeinwohl schadet. Differenziert zu diskutieren ist: *Wo soll es wie viel Konkurrenz unter welchen Rahmenbedingungen geben?*

Zu dieser Diskussion will der vorliegende Band beitragen. Er bietet eine fundierte interdisziplinäre Analyse von Konkurrenzphänomenen und Konkurrenztheorien, die historische, strukturelle und normative Perspektiven integriert. Er vereint historische, juristische, wirtschafts- und politikwissenschaftliche, soziologische, biologiethoretische, religionswissenschaftliche und literaturwissenschaftliche Studien. Diese liefern Ausgangspunkte für differenzierte Diskussionen über Konkurrenz als Prinzip individueller Entwicklung und gesellschaftlicher Organisation.

Im ersten Aufsatz des Bandes behandelt HANS-MICHAEL EMPPELL drei wesentliche Etappen aus der Geschichte des Konkurrenzbegriffs und des Aufstiegs von Konkurrenz zu einem Epochenparadigma. Unter dem Titel *Vom Recht zur Ökonomie. ›Konkurrenz‹ im römischen Recht, in der Schule von Salamanca und bei den französischen Physiokraten* rekonstruiert er zunächst die Bedeutung von *concurrere* und *concursum* im antiken römischen Recht, das die Grundlage des mittelalterlichen und neuzeitlichen europäischen Rechts bildet. Sodann legt der Autor dar, wie Theologen und Juristen der spanischen Spätscholastik aus der Schule von Salamanca, die zu den Gründervätern der modernen Ökonomie gehören, im 16. Jahrhundert beginnen, den Begriff der *concurrentia* zum ersten Mal explizit in ökonomischem Sinn verwenden. Schließlich zeichnet er nach, wie der Konkurrenzbegriff in der Physiokratie, einer ökonomischen Theorie der französischen Aufklärung, grundlegende Bedeutung für das Verständnis von Wirtschaftssystemen erlangt.

Der zweite Beitrag: *Konkurrenz – wie viel darf's denn sein? Zum theoretischen Fundament und der Frage nach dem richtigen Maß in Ökonomie und Politik* von HANS DIEFENBACHER und DOROTHEE RODENHÄUSER verfolgt die ökonomische Perspektive auf Konkurrenz weiter, differenziert sie und verbindet sie systematisch mit politikwissenschaftlichen Perspektiven: Einerseits müsse ökonomische Konkurrenz immer mit dem politisch dafür gesetzten Rahmen zusammengedacht werden, andererseits hätten ökonomische Theorieelemente Eingang in politische Theorien gefunden. Die Ausgangshypothese des Beitrags lautet, dass es von Konkurrenz sowohl ein Zuwenig als auch ein Zuviel geben kann, wobei die Antwort jeweils kontextabhängig ist. Ausgehend von einer historisch fundierten Darstellung ökonomischer und politikwissenschaftlicher Definitionen von Konkurrenz, von Theorien über ihre Wirkungen sowie von Hypothesen über notwendige Rahmenbedingungen für Konkurrenz werden – für Ökonomie und Politikwissenschaft – unterschiedliche Positionen einer kritischen Analyse unterzogen: Positionen, die für ein Maximum (Neoliberalismus/Neoklassik bzw. Schumpeters Theorie der Konkurrenzdemokratie) oder aber ein Minimum (Konzeptionen solidarischen, gemeinwesenorientierten Wirtschaftens bzw. Theorien einer Konkordanz-/Konsensdemokratie) oder aber ein dazwischen liegendes Optimum (Euckens ordoliberalen Vorstellungen bzw. Demokratietheorien identitärer oder partizipatorischer Prägung) an Konkurrenz argumentieren. Der Beitrag mündet in Thesen zum richtigen Maß von Konkurrenz in Wirtschaft und Politik, darunter die These, dass es gerade in heterogenen Gesellschaften eines Ausstärkens zwischen konkurrenz- und kooperationsorientierten Elementen bedarf.

In seinem Aufsatz *Kapitalismus und Staatenkonkurrenz* entwickelt TOBIAS TEN BRINK die These, dass die zunehmend transnationale Weltwirtschaft einerseits und das fortbestehende Staatensystem andererseits ein konfliktbeladenes Spannungsfeld bilden, das in Visionen einer harmonischen, postnationalen Weltgesellschaft nicht hinreichend berücksichtigt wird. Er fundiert diese These in einer systematischen, auch historische Wandlungen nachzeichnenden Analyse der vielfältigen Wechselverhältnisse zwischen einerseits sozio-ökonomischen Unternehmenskonkurrenzen und andererseits geopolitischen Staatenkonkurrenzen, in denen die modernen Staaten auch und gerade durch ›weiche‹ Geopolitik unterhalb der Schwelle offener Gewaltanwendung ihren Einfluss in externen Räumen zu verteidigen und steigern suchen. Da diese beiden Konkurrenzformen – wenngleich sie nicht aufeinander reduzierbar und an verschiedenartigen Reproduktionskriterien orientiert sind – durch wechselseitige Abhängigkeiten verbunden sind, münden Unternehmenswettbewerbe nicht selten in politisch vermittelte Standortkonkurrenzen und außenwirtschaftspolitische Konkurrenz-dynamiken, die der Autor unter Stichworten wie Multipolarität, Wettbewerbsstaatlichkeit, Funktionsstörungen in internationalen Institutionen und Währungskonkurrenz beschreibt.

Es folgen zwei Aufsätze, die sich mit biologischen Theorien über Konkurrenz befassen, wobei sie in historischer und wissenschaftstheoretischer Perspektive auch auf unterschiedliche Definitionen von Konkurrenz und auf Etablierung von Konkurrenz als Naturprinzip eingehen. Der erste Aufsatz fokussiert auf populationsökologische und evolutionsbiologische, der zweite auf synökologische und evolutionsbiologische Fragen.

GEORG TOEPFER fragt unter dem Titel *Die Rote Königin jagt den Hofnarren. Konkurrenz auf der Bühne der Ökologie und im Spiel der Evolution* zunächst: Ist Konkurrenz auf der lokalen Ebene der Populationen eine entscheidende Ursache für natürliche Selektion? Er diskutiert die traditionellen Ansichten, dass Konkurrenz entscheidend beiträgt zur Erhöhung der Vielfalt von Organismen, zur Entstehung ökologischer Gleichgewichte sowie zur gerichteten Veränderung in Abstammungslinien. Sodann thematisiert Toepfer die Rolle von Konkurrenz auf der globalen genealogischen Ebene langfristiger Makroevolution, also für das Entstehen und Vergehen neuer Arten und höherer taxonomischer Gruppen. Dabei analysiert er insbesondere die sogenannte Rote Königin-Hypothese, der zufolge biotische Interaktionen wie Konkurrenz die entscheidenden Faktoren evolutionärer Veränderung sind, und die entgegengesetzte sogenannte Hofnarr-Hypothese, der zufolge vor allem gravierende Veränderungen abiotischer Umweltbedingungen entscheidend sind. Im Ergebnis konstatiert Toepfer, dass sich

kein einheitliches Bild der Rolle von Konkurrenz ergibt. Zwar sei Konkurrenz als ökologischer Faktor gut belegt, der dominante Motor der Diversifizierung des Lebens im Laufe der Erdgeschichte sei aber wohl eher die Eroberung neu(artig)er Lebensräume bzw. ökologischer Nischen infolge der evolutionären Entwicklung neu(artig)er Lebensweisen.

THOMAS KIRCHHOFF geht in seinem Beitrag *Konkurrenz in der Natur. Interspezifische Konkurrenz als Organisations- und Entwicklungsprinzip von Ökosystemen?* von der Feststellung aus, dass in der Naturwissenschaft Ökologie seit ihrer Entstehung vor gut einem Jahrhundert grundlegende Kontroversen darüber geführt werden, nach welchen Prinzipien ökologische Gesellschaften/Biozönosen bzw. Ökosysteme sich organisieren und entwickeln. Ein wesentlicher Streitpunkt sei dabei, welchen Einfluss interspezifische Konkurrenz hat: Wie häufig und wie stark tritt sie auf, welche Wirkungen hat sie und wie einflussreich ist sie im Vergleich zu anderen ökologischen Interaktionen, zu abiotischen Umweltfaktoren und zu stochastischen Prozessen? Der Autor rekonstruiert vier Konfliktachsen, die sich in dieser Kontroverse überschneiden: (1) Welchen Stellenwert hat sie als Organisationsprinzip von Biozönosen? (2) Sind Konkurrenzsysteme Gleichgewichts- oder Ungleichgewichtssysteme? (3) Entsteht Artendiversität in Biozönosen durch konkurrenzinduzierte koevolutionäre Divergenz oder durch unabhängige Evolution? (4) Führt Konkurrenz zu koevolutionärer Divergenz oder zu koevolutionärer Konvergenz? Abschließend entwickelt der Autor die These, dass die Existenz konkurrierender Theorien über die Bedeutung von interspezifischer Konkurrenz in der Ökologie vor einem außerhalb der Naturwissenschaft Ökologie liegenden Hintergrund zu deuten ist: nämlich der Existenz konkurrierender Auffassungen über menschliche Vergesellschaftung und Modi der Sozialintegration.

In der soziologischen Theoriediskussion führte der Konkurrenzbegriff, nach einigen frühen Analysen etwa durch Georg Simmel und Karl Mannheim, lange Zeit ein Schattendasein. In seinem Beitrag *Konkurrenz als Beharrungsprinzip. Soziologische Theorie im Anschluss an Lewis Carroll* nimmt TILMAN REITZ eine explizit soziologische Perspektive ein, die sich bewusst von ökonomischen Perspektiven löst, und sucht nach Antworten auf zwei ungeklärte, aber zentrale soziologische Fragen zur Rolle von Konkurrenz in modernen Gesellschaften: Prägt Konkurrenz auch dort unser Zusammenleben, wo der kapitalistische Markt (noch) nicht hinreicht? Sorgt Konkurrenz vorwiegend für gesellschaftliche Dynamik oder bringt sie im Gegenteil Ordnung und Beharrung hervor? Um zu einer Antwort zu gelangen, zieht der Autor zum einen die klassischen soziologischen Analysen von Georg Simmel und Karl Mannheim zu Konkurrenz

heran und rekonstruiert – ausgehend von Luhmanns und Parsons' Theorie funktional differenzierter Teilsysteme – Konkurrenzbeziehungen jenseits monetärer Märkte. Zum anderen thematisiert er – ausgehend von Habermas' kritischem Verständnis systemischer Vergesellschaftung und Bourdieus Kategorien nicht-ökonomischen Kapitals – strukturerhaltende und soziale Unterordnungen reproduzierende Effekte von Konkurrenz.

Unter dem Titel *Konkurrenz und Solidarität. Alternative oder verwobene Formen sozialer Interaktion?* thematisiert MARKUS VOGT das Verhältnis von Konkurrenz, Kooperation und Solidarität. Er macht deutlich: Diese kulturellen Handlungsmuster schließen sich nicht etwa aus, sondern sind mannigfaltig verwoben – wobei Vogt insbesondere eingeht auf Kooperation als Mittel zur Erhöhung der Konkurrenzfähigkeit und auf das Ordnungsmodell der Sozialen Marktwirtschaft, dem zufolge Markt und Sozialstaat als Institutionalisierungsformen von Konkurrenz und Solidarität sich wechselseitig nicht nur begrenzen, sondern auch ermöglichen und stärken. Vogt macht aber auch deutlich: Konkurrenz und Solidarität stellen trotz aller Verwobenheiten doch Gegenpole im Möglichkeitsraum menschlicher Beziehungs- und Lebensideale dar, die nicht vollständig harmonisierbar sind; denn Solidarität transzendiert in fundamentaler Weise jedes Konkurrenzdenken. Die entscheidende sozialetische Frage sei deshalb, wie die Interaktionsformen des Konkurrerens und der Solidarität auf die richtige Weise miteinander verwoben werden können, wobei es nicht darum gehe, irgendwo in der Mitte zwischen den beiden Extremen einen Kompromiss zu suchen; vielmehr müssten beide Verhaltensweisen auf ihre jeweiligen Voraussetzungen, Grenzen und Bedingungen hin analysiert werden, um Zuordnungen zu finden, in denen sie sich wechselseitig so durchdringen und begrenzen, dass eine konstruktive soziale Dynamik entsteht. Konkret heiße das zum Beispiel: Konkurrenz ist so zu lenken, dass sie dem Wohl der Schwächsten und einer umfassenden menschlichen Entwicklung diene; Solidarität ist nicht (nur) paternalistisch-fürsorglich und mildtätig-helfend, sondern reziprok-egalitär als Ermöglichung von Leistung, als Hilfe zur Selbsthilfe zu gestalten.

In seinem Aufsatz *Konkurrenz – Ordnungsprinzip zwischen Integration und Desintegration* analysiert PETER IMBUSCH die Bedeutung von Konkurrenz für die Integrations- und Desintegrationsproblematik moderner Gesellschaften. Dazu beleuchtet er, auf der Basis einer Reflexion auf soziologische Einsichten zu Wesen und Gehalt von Konkurrenz, unterschiedliche Arten und Formen von Konkurrenz bezüglich ihrer Konsequenzen für ökonomische, politische, soziale und kulturelle Integration oder aber Desintegration. Dabei unterscheidet er analytisch die sozialstrukturelle Ebene der Teilhabe an materiellen und kulturellen

Gütern (positionale Anerkennung), die institutionelle Ebene der Sicherstellung des Ausgleichs konfligierender Interessen (moralische Anerkennung) und die personale Ebene der Herstellung emotionaler bzw. expressiver Beziehungen zwischen Personen zum Zwecke von Sinnstiftung und Selbstverwirklichung (emotionale Anerkennung). So kann der Autor nicht nur soziale und systemische Integrations- und Desintegrationsaspekte differenzieren, sondern, jenseits vereinfachender Gleichsetzungen von Stabilität und Integration bzw. Integration und Konfliktfreiheit, auch unterscheiden zwischen positiver und negativer Integration (Stabilität/Sicherheit versus Zwang/Kontrolle) bzw. zwischen positiver und negativer Desintegration (sozialer Wandel/innovative Abweichungen versus Ausgrenzung/Gewalt). Das Ergebnis ist eine differenzierte Analyse der Möglichkeiten und Grenzen konkurrenzbasierter Integration in modernen Gesellschaften. Diese führen den Autor zu dem Schluss, dass die Integrationsmechanismen moderner Gesellschaften mit der Ausbreitung des Konkurrenzprinzips immer stärker unter Druck geraten werden. Nur durch ein geordnetes Verhältnis von Konkurrenz und Kooperation sowie eine effektive Einhegung des Konkurrenzprinzips könne gesellschaftliche Integration befördert und soziale Desintegration vermieden werden.

Der Beitrag *Individualisierung durch Konkurrenz. Grundlagen und Entwicklungsdynamik antagonistischer Kooperation* von MAGNUS SCHLETTE fundiert Konkurrenz in den grundlegenden Reziprozitätsverhältnissen sozialer Kooperation und fragt nach ihrer strukturellen Bedeutung für die Individuierung von Lebenspraxis. Konkurrenzverhältnisse werden in der Wechselbeziehung von sozialen Bewährungserwartungen und individuellen Anerkennungsforderungen verortet; im Rahmen dieser Wechselbeziehung fokussiert Schlette spezifisch solche Konkurrenzverhältnisse, die durch die gemeinsame Orientierung der sozialen Akteure an Maßstäben des adverbialen Guten (im Unterschied zum prudentiellen Guten und zum moralischen Guten) orientiert sind. Schlettes These lautet, dass Konkurrenzverhältnisse durch die Wechselbeziehung von Bewährungserwartung und Anerkennungsforderung begünstigt werden und ihrerseits zur fortschreitenden Individualisierung dieser Wechselbeziehung führen. Darin sieht er zugleich Chancen und Gefahren für die Individuierung von Lebenspraxis.

Der Aufsatz *Konkurrenz der Religionen?* von ROLF SCHIEDER setzt sich kritisch mit der Anwendung der *rational choice*-Theorie auf Religionen auseinander, speziell mit dem Modell eines ›Marktes der Religionen‹. Zunächst charakterisiert der Autor dieses Modell, das einen Paradigmenwechsel in der Religionsforschung bewirkt hat, und würdigt, dass es maßgeblich zur Infragestellung des Säkularisierungsnarrativs beigetragen und die Reformbedürftigkeit

kirchlicher Angebote in den Blick gerückt hat. Sodann fragt er nach den Grenzen des religionsökonomischen Marktmodells: Ist das für die USA entwickelte Modell auf andere Regionen übertragbar? Sind Religionskulturen überhaupt hinreichend mit Begriffen wie ›Produkt‹, ›Konsument‹, ›Konkurrent‹ und ›Markt‹ erfassbar? Seine Antworten entwickelt der Autor ausgehend von Luhmanns Bestimmung, dass die Funktion von Religion darin liege, das Problem der Kontingenz erträglich zu machen. Dabei thematisiert er zugleich, inwiefern der Glaube an das Funktionieren der Märkte selbst Züge von Religiosität trägt, inwiefern christliche Techniken der Selbstregierung instrumentalisierbar sind für das neoliberalistische Ideal unternehmerischer Individualität, inwiefern den Religionsgemeinschaften durch religiöse Aufladungen politischer oder sozialer Phänomene neue Konkurrenzen entstehen und inwiefern nicht etwa Geltungssucht, sondern der Wunsch nach Anerkennung viele Menschen in das Konkurrenzparadigma einwilligen lässt. Deutlich wird, dass das Marktmodell den Religionen in einem doppelten Sinne nicht gerecht wird: weil Religionen keine Marktgüter für rationale Konsumenten sind; und weil das Interesse an ihnen in Identifikationsangeboten gründet, die jenseits leistungsbewertender Konkurrenzbeziehungen liegen und zu einer Kultur der Anerkennung gehören, ohne die Konkurrenz gnadenlos ist.

Unter dem Titel *Konkurrenz und Kompetenz* entwickelt REINHARD SCHULZ eine Kritik der Strategie, auf den forcierten Leistungsanspruch und Konkurrenzdruck in nahezu allen Lebensbereichen zu reagieren, indem man vielfältige Kompetenzen auszubilden versucht. Er geht davon aus, dass Kompetenz mittlerweile zum erklärten Ziel unserer Bildungsinstitutionen geworden ist und deren altes Bildungsideal abgelöst hat. Dieser Umbruch sei jedoch mit einem Unbehagen gepaart, das sich für den Einzelnen in einer ganzen Fülle negativer Begleitsymptome wie Unrast, Stress, Depression und Gefühlen von Lust- und Sinnlosigkeit offenbaren kann. Deshalb und weil die Erfolgsversprechen der Kompetenzerweiterung allzu häufig unerfüllt blieben, sei jene Strategie jedoch auch in Misskredit geraten. Diese Konstellation mache es notwendig, über das Verhältnis von Konkurrenz und Kompetenz neu philosophisch nachzudenken. Dazu geht Schulz vier Fragen nach: 1. Besteht zwischen Konkurrenz und Kompetenz eine kausale Beziehung oder kann Kompetenzentwicklung auch bisher nicht gekannte Konkurrenzen hervorbringen? 2. Handelt es sich bei Konkurrenz um eine natürliche Tatsache oder eher um die Folge einer bestimmten kapitalistischen Produktionsweise? 3. Kann sich der Kompetenzbegriff im Vergleich etwa mit dem Bildungs-, Emanzipations- oder Aufklärungsbegriff bewähren oder soll er diese Begriffe auf eine fragwürdige Weise ›überwinden‹ helfen? 4. Besitzen Begriffe



wie Konkurrenz und Kompetenz überhaupt genügend historische Trennschärfe, um die moderne Gesellschaft angemessen beschreiben zu können; oder besteht nicht vielmehr die Gefahr, dass vor allem der Glaube an die Kompetenz der Anderen Konkurrenzgefühle negativer Art in uns wachrufen kann? Der Autor gelangt unter anderem zu dem Schluss: Im Hinblick auf den Zusammenhang von Konkurrenz und Kompetenz muss dem Lernen gepaart mit sich selbst bewusst werdender Erfahrung im Unterschied zum Lernen gepaart mit standardisierbarer Kompetenz größere Aufmerksamkeit geschenkt werden. Erforderlich sei ein Kompetenz und Bildung vermittelnder Lernbegriff.

Der Beitrag *Konkurrenz im Gesundheitssystem* von A. KATARINA WEILERT und JULIA PFITZNER differenziert zunächst drei Ebenen von Konkurrenz, die für das Gesundheitssystem relevant sind: die Makroebene, auf der es mit anderen Gesundheitssystemen bzw. Politikbereichen um Ressourcen konkurriert, die Mesoebene, auf der die unterschiedlichen Bereiche innerhalb des Gesundheitssystems miteinander um dessen Budget konkurrieren, und die Mikroebene individueller Konkurrenzen der Patienten um Anteile an Gesundheitsdienstleistungen. Im Hauptteil wird – mit einem Fokus auf die juristische und die ethische Perspektive – differenziert analysiert zum einen die Konkurrenz zwischen Gesetzlicher Krankenversicherung und Privater Krankenversicherung, also zwischen einem solidarischen und einem marktwirtschaftlich organisierten Ansatz, zum anderen der Umgang mit Konkurrenz um Gesundheitsleistungen innerhalb der Gesetzlichen Krankenversicherung, womit auch thematisiert ist, inwiefern innerhalb eines solidarisch konzipierten Systems Optimierungen mittels des Konkurrenzprinzips möglich und ethisch vertretbar sind. So widmet sich der Beitrag dem drängenden gesellschaftlichen Problem der Verteilungsgerechtigkeit, Kostenbegrenzung und Effektivität im Gesundheitswesen.

Der Gesundheitsmarkt ist hoch reguliert und gleichwohl stark umkämpft. In seinem Beitrag *Die Inszenierung von Alternativen. Zur Konkurrenz bio- und alternativmedizinischer Heilverfahren im Gesundheitswesen* untersucht THORSTEN MOOS die Inszenierung dieser Konkurrenz, die auf ganz unterschiedlichen Bühnen ausgetragen wird: von Krankenkassen, die mit Zusatzangeboten um gut ausgebildete und solvente Kunden werben, über Arztpraxen, die Individuelle Gesundheitsleistungen anbieten, sowie Angebote von Heilpraktikern bis zur Selbstmedikation. Der Autor macht deutlich, dass diese Inszenierung nicht nur den Markt strukturiert, sondern auch die gesellschaftliche Kommunikation über Krankheit und Gesundheit sowie über Chancen, Grenzen und Aporien der Medizin prägt bzw., anders betrachtet, Grundprobleme des Krankseins und des Therapierens unter den Bedingungen eines modernen, hoch ausdifferenzierten

Medizin- bzw. Gesundheitssystems reflektiert. Dabei zeigt sich, dass die Alternativmedizin nicht nur auf der Ebene hybrider Praktiken, sondern auch auf der Ebene der deutenden Reflexion von Kranksein und Heilen integraler Bestandteil moderner Medizinkultur ist. Die Inszenierung der Konkurrenz von Bio- und Alternativmedizin untersucht der Autor exemplarisch in drei Zugängen: Zunächst analysiert er die Homöopathie als Antipoden biomedizinischer Professionalisierung im 19. Jahrhundert. Dann untersucht er den gegenwärtigen Gesundheitsmarkt anhand alternativmedizinischer Populärzeitschriften. Schließlich nimmt er die Terlusologie als Heilverfahren jüngerer Datums in den Blick. Dabei fragt er jeweils, auf welchen Feldern Konkurrenz inszeniert wird, in welchen Formen dies geschieht, welche Struktur von Konkurrenz im Blick ist und wie diese Konkurrenz handhabbar gemacht wird.

Den Abschluss des Bandes bildet der Beitrag von JÖRG THOMAS RICHTER: *Von Deutungsmacht und Bücherschlacht. Vermerke zu literarischen Konkurrenzen*. Der Autor analysiert, in zwei Perspektiven, inwiefern Konkurrenz bzw. Wettstreit die Literatur prägt: extrapoietisch als Sujet der Literatur und intra-poietisch als Verfahren der Literatur. Mit Blick auf das Sujet belegt Richter anhand zahlreicher literarischer Texte, dass die Thematisierung von Konkurrenz in der Literatur sich – ganz im Sinne von Karl Mannheims Bestimmung der Konkurrenz als eine allgemeine soziale Beziehung – keineswegs auf ökonomische Konkurrenz beschränkt, auch wenn der *New Economic Criticism* eine ihrer prominenten Richtungen ist. Richter zeigt, dass Literatur darüber hinaus Thematisierungen, ja produktive Entfaltungen einer großen Vielfalt extraökonomischer Konkurrenzsemantiken bzw. agonistischer Auseinandersetzungen beinhaltet, wobei ihre Reflexionen sich eher aus der Spannung zur Episteme der Wissenschaften über Konkurrenz entfalten als in Komplementarität mit dieser Episteme. Mit Blick auf das Verfahren der Literatur macht Richter anschaulich, wie Wettbewerb auf poetologischer Ebene als grundlegende Produktionsverfahren fungiert. Er fokussiert dabei auf zwei Topoi der produktiven Auseinandersetzung mit Traditionen und mit zeitgenössischen Widerparten: zum einen auf den literarischen Agon, einen Wettstreit zwischen Kontrahenten innerhalb eines Metiers vor Publikum um dessen Anerkennung bzw. um Meisterschaft und Ruhm, wobei der Autor sich auf die Analysen von Jacob Burckhardt und Friedrich Nietzsche stützt; zum anderen fokussiert er auf die poetische Konkurrenz der Bücherschlacht am Anfang des 18. Jahrhunderts, deren Hintergrund die lodernde *Querelle des Anciens et des Modernes* bildet.

## LITERATUR

- Abrams, Peter A. 1987: On classifying interactions between populations. *Oecologia* 73 (2): 272–281.
- Bal, Mieke 2002: Travelling concepts in the humanities. A rough guide. Toronto, University of Toronto Press.
- Bator, Francis M. 1958: The anatomy of market failure. *The Quarterly Journal of Economics* 72 (3): 351–379.
- Begon, Michael; Harper, John Lander & Townsend, Colin R. 1996: Ecology. Individuals, populations and communities. Oxford, Blackwell.
- Benz, Arthur 2007: Politischer Wettbewerb. In: Benz, Arthur; Lütz, Susanne; Schimank, Uwe & Simonis, Georg (Hg.): Handbuch Governance. Theoretische Grundlagen und empirische Anwendungsfelder. Wiesbaden, VS Verlag für Sozialwissenschaften: 54–67.
- Binhack, Axel 1998: Über das Kämpfen. Zum Phänomen des Kampfes in Sport und Gesellschaft. Frankfurt/M., Campus.
- Binswanger, Mathias 2010: Sinnlose Wettbewerbe. Warum wir immer mehr Unsinn produzieren. Freiburg, Herder.
- Böhler, Eugen 1950: Die Konkurrenz als Organisationsprinzip der Wirtschaft. *Schweizerische Zeitschrift für Volkswirtschaft und Statistik* 86: 381–397.
- Boucher, Douglas H.; James, Sam & Keeler, Kathleen H. 1982: The ecology of mutualism. *Annual Review of Ecology and Systematics* 13: 315–347.
- Boudon, Raymond 1974: Education, opportunity, and social inequality. Changing prospects in Western society. New York, Wiley.
- Bourdieu, Pierre 1982: Die feinen Unterschiede. Kritik der gesellschaftlichen Urteilskraft. Frankfurt/M., Suhrkamp.
- Brecher, Jeremy & Costello, Tim 1999: Global village or global pillage. Economic reconstruction from the bottom up. Second edition. Cambridge, South End Press.
- Bröckling, Ulrich 2007: Das unternehmerische Selbst. Soziologie einer Subjektivierungsform. Frankfurt/M., Suhrkamp.
- Candolle, Augustin-Pyramus de 1820: Géographie botanique. In: Levraut, F. G. (Hg.): Dictionnaire des sciences naturelles, tome 18, GA–GJU. Paris, Levraut: 359–422.
- Cerny, Philip G. 1990: The changing architecture of politics: structure, agency, and the future of the state. London, Sage.
- Darwin, Charles 1859: On the origin of species by means of natural selection, or the preservation of favoured races in the struggle for life. London, Murray.

- Degele, Nina & Dries, Christian 2005: Modernisierungstheorie. Eine Einführung. München, UTB/Fink.
- Duret, Pascal 2009: Sociologie de la compétition. Paris, Armand Colin.
- Eisel, Ulrich 2004: Politische Schubladen als theoretische Heuristik. Methodische Aspekte politischer Bedeutungsverschiebungen in Naturbildern. In: Fischer, Ludwig (Hg.): Projektionsfläche Natur. Zum Zusammenhang von Naturbildern und gesellschaftlichen Verhältnissen. Hamburg, Hamburg University Press: 29–43.
- Elias, Norbert 1939/1992: Über den Prozeß der Zivilisation. Soziogenetische und psychogenetische Untersuchungen. Zweiter Band: Wandlungen der Gesellschaft: Entwurf zu einer Theorie der Zivilisation. Frankfurt/M., Suhrkamp.
- Elias, Norbert 1991: Die Gesellschaft der Individuen. Frankfurt/M., Suhrkamp.
- Fritsch, Michael 2014: Marktversagen und Wirtschaftspolitik. Mikroökonomische Grundlagen staatlichen Handelns. 9., vollständig überarbeitete Auflage. München, Vahlen.
- Georges, Karl E. 1972: [Eintrag] con-curro. In: Georges, Heinrich (Hg.): Ausführliches lateinisch-deutsches Handwörterbuch. Hannover, Hahnsche Buchhandlung: 1414–1415.
- Giegel, Hans-Joachim 2008: Gleichheit und Ungleichheit in funktional differenzierten Gesellschaften. In: Schwinn, Thomas (Hg.): Differenzierung und soziale Ungleichheit. Die zwei Soziologien und ihre Verknüpfung. Frankfurt/M., Humanities Online: 105–130.
- Großklaus, Götz 1983: Der Naturraum des Kulturbürgers. In: Großklaus, Götz & Oldemeyer, Ernst (Hg.): Natur als Gegenwelt. Beiträge zur Kulturgeschichte der Natur. Karlsruhe, von Loeber: 169–196.
- Grubel, Herbert G. 1966: The anatomy of classical and modern infant industry arguments. *Weltwirtschaftliches Archiv* 97: 325–344.
- Harms, Jens & Reichard, Christoph 2003: Ökonomisierung des öffentlichen Sektors – eine Einführung. In: Harms, Jens & Reichard, Christoph (Hg.): Die Ökonomisierung des öffentlichen Sektors: Instrumente und Trends. Baden-Baden, Nomos: 13–17.
- Hartfiel, Günter (Hg.) 1977a: Das Leistungsprinzip. Merkmale – Bedingungen – Probleme. Opladen, Leske + Budrich.
- Hartfiel, Günter 1977b: Einleitung. In: Hartfiel, Günter (Hg.): Das Leistungsprinzip. Merkmale – Bedingungen – Probleme. Opladen, Leske + Budrich: 7–48.
- Hayek, Friedrich A. von 1973/2002: Liberalismus. In: Vanberg, Viktor J. (Hg.): F. A. Hayek: Grundsätze einer liberalen Gesellschaftsordnung: Aufsätze zur Politischen Philosophie und Theorie. Tübingen, Mohr Siebeck: 88–120.

- Heimann, Eduard 1929: Soziale Theorie des Kapitalismus. Theorie der Sozialpolitik. Tübingen, Mohr.
- Herdzina, Klaus 1999: Wettbewerbspolitik. 5. Auflage. Stuttgart, UTB/Lucius & Lucius.
- Herzog, Lisa & Honneth, Axel (Hg.) 2014: Der Wert des Marktes. Ein ökonomisch-philosophischer Diskurs vom 18. Jahrhundert bis zur Gegenwart. Berlin, Suhrkamp.
- Hirschman, Albert O. 1977: The passions and the interests: political arguments for capitalism before its triumph. Princeton, Princeton University Press.
- Hölkeskamp, Karl-Joachim 2014: Konkurrenz als sozialer Handlungsmodus – Positionen und Perspektiven der historischen Forschung. In: Jessen, Ralph (Hg.): Konkurrenz in der Geschichte. Praktiken – Werte – Institutionalisierungen. Frankfurt/M., Campus: 33–57.
- Honneth, Axel 2009: Frei, aber abhängig: Zu den Paradoxien des Kapitalismus und der Zukunft des Instituts für Sozialforschung. Gespräch mit Ulrike Jaspers. In: Basaure, Mauro; Reemtsma, Jan P. & Willig, Rasmus (Hg.): Erneuerung der Kritik. Axel Honneth im Gespräch Frankfurt/M., Campus: 39–47.
- Horkheimer, Max & Adorno, Theodor W. 1947/1993: Dialektik der Aufklärung. Philosophische Fragmente. Frankfurt/M., Fischer.
- Imbusch, Peter & Heitmeyer, Wilhelm (Hg.) 2008: Integration – Desintegration. Ein Reader zur Ordnungsproblematik moderner Gesellschaften. Wiesbaden, VS Verlag für Sozialwissenschaften.
- Jessen, Ralph 2014a: Konkurrenz in der Geschichte – Einleitung. In: Jessen, Ralph (Hg.): Konkurrenz in der Geschichte. Praktiken – Werte – Institutionalisierungen. Frankfurt/M., Campus: 7–32.
- Jessen, Ralph (Hg.) 2014b: Konkurrenz in der Geschichte. Praktiken – Werte – Institutionalisierungen. Frankfurt/M., Campus.
- Kerr, Clark 1983: The future of industrial societies: convergence or continuing diversity? Cambridge, Harvard University Press.
- Kirchhoff, Thomas 2007: Systemauffassungen und biologische Theorien. Zur Herkunft von Individualitätskonzeptionen und ihrer Bedeutung für die Theorie ökologischer Einheiten. Freising, Technische Universität München. Auch online verfügbar: <http://nbn-resolving.de/urn:nbn:de:101:1-20090406396>.
- Kirchhoff, Thomas 2011: ›Natur‹ als kulturelles Konzept. *Zeitschrift für Kulturphilosophie* 5 (1): 69–96.
- Kirchhoff, Thomas 2014: Community-level biodiversity: an inquiry into the ecological and cultural background and practical consequences of opposing concepts. In: Lanzerath, Dirk & Friele, Minou (Hg.): Concepts and values in biodiversity. London, Routledge: 99–119.

- Kirchhoff, Thomas 2015: Die Zeitform der Entwicklung von Ökosystemen und ökologischen Gesellschaften. In: Hartung, Gerald (Hg.): Mensch und Zeit. Wiesbaden, VS Verlag für Sozialwissenschaften: 226–248.
- Kluge, Friedrich 2002: [Eintrag] konkurrieren. In: Etymologisches Wörterbuch der deutschen Sprache. Bearbeitet von Elmar Seebold. 24., durchgesehene und erweiterte Auflage. Berlin, de Gruyter: 521–521.
- Köchy, Kristian 2006: Einleitung: Umwelt-Handeln. Zum Zusammenhang von Naturphilosophie und Umweltethik. In: Köchy, Kristian & Norwig, Martin (Hg.): Umwelt-Handeln. Zum Zusammenhang von Naturphilosophie und Umweltethik. Freiburg, Alber: 11–26.
- Kocka, Jürgen 2014: Geschichte des Kapitalismus. München, Beck.
- Mannheim, Karl 1929: Die Bedeutung der Konkurrenz im Gebiete des Geistigen. In: (DGS), Deutsche Gesellschaft für Soziologie (Hg.): Verhandlungen des 6. Deutschen Soziologentages vom 17. bis 19. September 1928 in Zürich: Vorträge und Diskussionen in der Hauptversammlung und in den Sitzungen der Untergruppen. Tübingen, Mohr Siebeck: 35–83.
- Marx, Karl 1857–1858/1953: Grundrisse der Kritik der politischen Ökonomie [MEW 42]. Berlin, Dietz.
- Neckel, Sighard 2001: ›Leistung‹ und ›Erfolg‹. Die symbolische Ordnung der Marktgesellschaft. In: Barlösius, Eva; Müller, Hans-Peter & Sigmund, Steffen (Hg.): Gesellschaftsbilder im Umbruch. Soziologische Perspektiven in Deutschland. Opladen, Leske & Budrich: 245–265.
- Nullmeier, Frank 2000: Politische Theorie des Sozialstaats. Frankfurt/M., Campus.
- Nullmeier, Frank 2002: Wettbewerbskulturen. In: Müller, Michael; Raufer, Thilo & Zifonun, Darius (Hg.): Der Sinn der Politik. Kulturwissenschaftliche Politikanalysen. Konstanz, UVK: 157–175.
- Nullmeier, Frank 2005: Wettbewerb und Konkurrenz. In: Blanke, Bernhard; Bandemer, Stephan von; Nullmeier, Frank & Wewer, Göttrik (Hg.): Handbuch zur Verwaltungsreform. 3., völlig überarbeitete und erweiterte Auflage. Wiesbaden, VS Verlag für Sozialwissenschaften: 108–120.
- Olten, Rainer 1995: Wettbewerbstheorie und Wettbewerbspolitik. München, Oldenbourg.
- Parsons, Talcott 1951: The social system. London, The Free Press of Glencoe.
- Philippe, Aghion; Christopher, Harris; Peter, Howitt & John, Vickers 2001: Competition, imitation and growth with step-by-step innovation. *Review of Economic Studies* 68 (3): 467–492.
- Polanyi, Karl 1944: The great transformation. New York, Farrar & Rinehart.

- Prochno, Renate 2006: Konkurrenz und ihre Gesichter in der Kunst: Wettbewerb, Kreativität und ihre Wirkungen. Berlin, Akademie Verlag.
- Rammstedt, Otthein 1976: Konkurrenz. In: Ritter, Joachim & Gründer, Karlfried (Hg.): Historisches Wörterbuch der Philosophie, Bd. 4. Darmstadt, Wissenschaftliche Buchgesellschaft: Sp. 970–974.
- Reckwitz, Andreas 2010: Das hybride Subjekt. Eine Theorie der Subjektkulturen von der bürgerlichen Moderne zur Postmoderne. Weilerswist, Velbrueck Wissenschaft.
- Rosa, Hartmut 2006: Wettbewerb als Interaktionsmodus. Kulturelle und sozialstrukturelle Konsequenzen der Konkurrenzgesellschaft. *Leviathan* 34 (1): 82–104.
- Rosa, Hartmut 2012: Weltbeziehungen im Zeitalter der Beschleunigung. Umrisse einer neuen Gesellschaftskritik. Frankfurt/M., Suhrkamp.
- Rosa, Hartmut; Strecker, David & Kottmann, Andrea 2007: Soziologische Theorien. Stuttgart, UTB/UVK Verlagsgesellschaft.
- Said, Edward W. 1983: Traveling theory. In: Said, Edward W. (Hg.): The world, the text, and the critic. Cambridge, Harvard University Press: 226–247.
- Schlette, Magnus 2013: Die Idee der Selbstverwirklichung. Zur Grammatik des modernen Individualismus. Frankfurt/M., Campus.
- Schumpeter, Joseph 1942: Capitalism, socialism and democracy. New York, Harper.
- Schweber, Silvan S. 1977: The origin of the *Origin* revisited. *Journal of the History of Biology* 10 (2): 229–316.
- Simmel, Georg 1903/1995: Soziologie der Konkurrenz. In: Kramme, Rüdiger; Rammstedt, Angela & Rammstedt, Otthein (Hg.): Aufsätze und Abhandlungen 1901–1908. Band I. Frankfurt/M., Suhrkamp: 221–246.
- Smith, Adam 1776: An inquiry into the nature and causes of the wealth of nations. London, Strahan & Cadell.
- Sonntag, Michael 1999: ›Das Verborgene des Herzens‹. Zur Geschichte der Individualität. Reinbek, Rowohlt.
- Tauschek, Markus (Hg.) 2013a: Kulturen des Wettbewerbs. Formationen kompetitiver Logiken. Münster, Waxmann.
- Tauschek, Markus 2013b: Zur Kultur des Wettbewerbs. Eine Einführung. In: Tauschek, Markus (Hg.): Kulturen des Wettbewerbs. Formationen kompetitiver Logiken. Münster, Waxmann: 7–36.
- Trepl, Ludwig 1987: Geschichte der Ökologie. Vom 17. Jahrhundert bis zur Gegenwart. Frankfurt/M., Athenäum.
- Trepl, Ludwig 1994: Competition and coexistence: on the historical background in ecology and the influence of economy and social sciences. *Ecological Modelling* 75–76: 99–110.

- Unger, Brigitte & van Waarden, Frans (Hg.) 1995: *Convergence or diversity*. Aldershot, Avebury.
- Veith, Hermann 2001: *Das Selbstverständnis des modernen Menschen. Theorien des vergesellschafteten Individuums im 20. Jahrhundert*. Frankfurt/M., Campus.
- Verheyen, Nina 2012: Unter Druck. Die Entstehung individuellen Leistungsstrebens um 1900. *Merkur* 66 (5): 382–390.
- Weber, Max 1922: *Wirtschaft und Gesellschaft. Grundriß der verstehenden Soziologie*. Tübingen, Mohr.
- Werron, Tobias 2009: Zur sozialen Konstruktion moderner Konkurrenzen. Das Publikum in der ›Soziologie der Konkurrenz‹. Workingpaper des Soziologischen Seminars 05/09 der Universität Luzern, September 2009. <http://nbn-resolving.de/urn:nbn:de:0168-ssoar-382948> (aufgerufen am 13.11.2014).
- Werron, Tobias 2010: Direkte Konflikte, indirekte Konkurrenzen. Unterscheidung und Vergleich zweier Formen des Kampfes. *Zeitschrift für Soziologie* 39 (4): 302–318.
- Werron, Tobias 2011: Zur sozialen Konstruktion moderner Konkurrenzen. Das Publikum in der ›Soziologie der Konkurrenz‹. In: Tyrell, Hartmann; Rammstedt, Otthein & Meyer, Ingo (Hg.): *Georg Simmels ›große‹ Soziologie. Eine kritische Sichtung nach hundert Jahren*. Bielefeld, transcript: 227–258.
- Wetzel, Dietmar J. 2013a: *Soziologie des Wettbewerbs. Eine kultur- und wirtschaftssoziologische Analyse der Marktgesellschaft*. Wiesbaden, VS Verlag für Sozialwissenschaften.
- Wetzel, Dietmar J. 2013b: *Soziologie des Wettbewerbs. Ergebnisse einer wirtschafts- und kultursoziologischen Analyse der Marktgesellschaft*. In: Tauschek, Markus (Hg.): *Kulturen des Wettbewerbs. Formationen kompetitiver Logiken*. Münster, Waxmann: 55–73.
- Williams, Raymond 1980: *Ideas of nature*. In: Williams, Raymond (Hg.): *Problems in materialism and culture*. London, Verso: 67–85.
- Winter, Martin & Würmann, Carsten 2012: Wettbewerb und Hochschulen. *die hochschule* 2012 (2): 6–16.
